## CORRECTION

# Correction: The role of perceived autonomy support and fear of failure: A weekly diary study on work-related rumination

Elif Manuoglu

## Notice of Republication

An incorrect version of S1 File and S2 File was published in error. This article was republished on January 18, 2024, to correct for this error. Please download this article again to view the correct version.

## Reference

1. Manuoglu E (2023) The role of perceived autonomy support and fear of failure: A weekly diary study on work-related rumination. PLoS ONE 18(10): e0291312. <https://doi.org/10.1371/journal.pone.0291312> PMID: [37851617](https://pubmed.ncbi.nlm.nih.gov/37851617/)

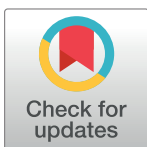

## OPEN ACCESS

**Citation:** Elif Manuoglu (2024) Correction: The role of perceived autonomy support and fear of failure: A weekly diary study on work-related rumination. PLoS ONE 19(1): e0298248. <https://doi.org/10.1371/journal.pone.0298248>

**Published:** January 31, 2024

**Copyright:** © 2024 Elif Manuoglu. This is an open access article distributed under the terms of the [Creative Commons Attribution License](https://creativecommons.org/licenses/by/4.0/), which permits unrestricted use, distribution, and reproduction in any medium, provided the original author and source are credited.
